# Supplementary figures and images for: A SLC4 family bicarbonate transporter is critical for intracellular pH regulation and biomineralization in sea urchin embryos
Source: eLife journal article supplement (doi:10.7554/elife.36600), 2018-05-01

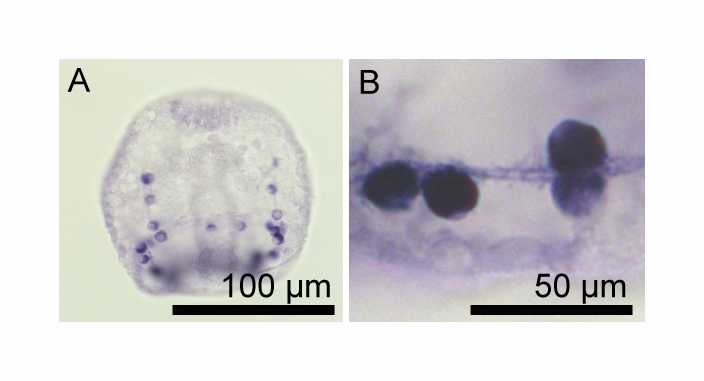

Supplement: supp [file elife-36600-supp-v1.zip › elife_poa_e36600_Figure_1_figure_supplement_1.tif]

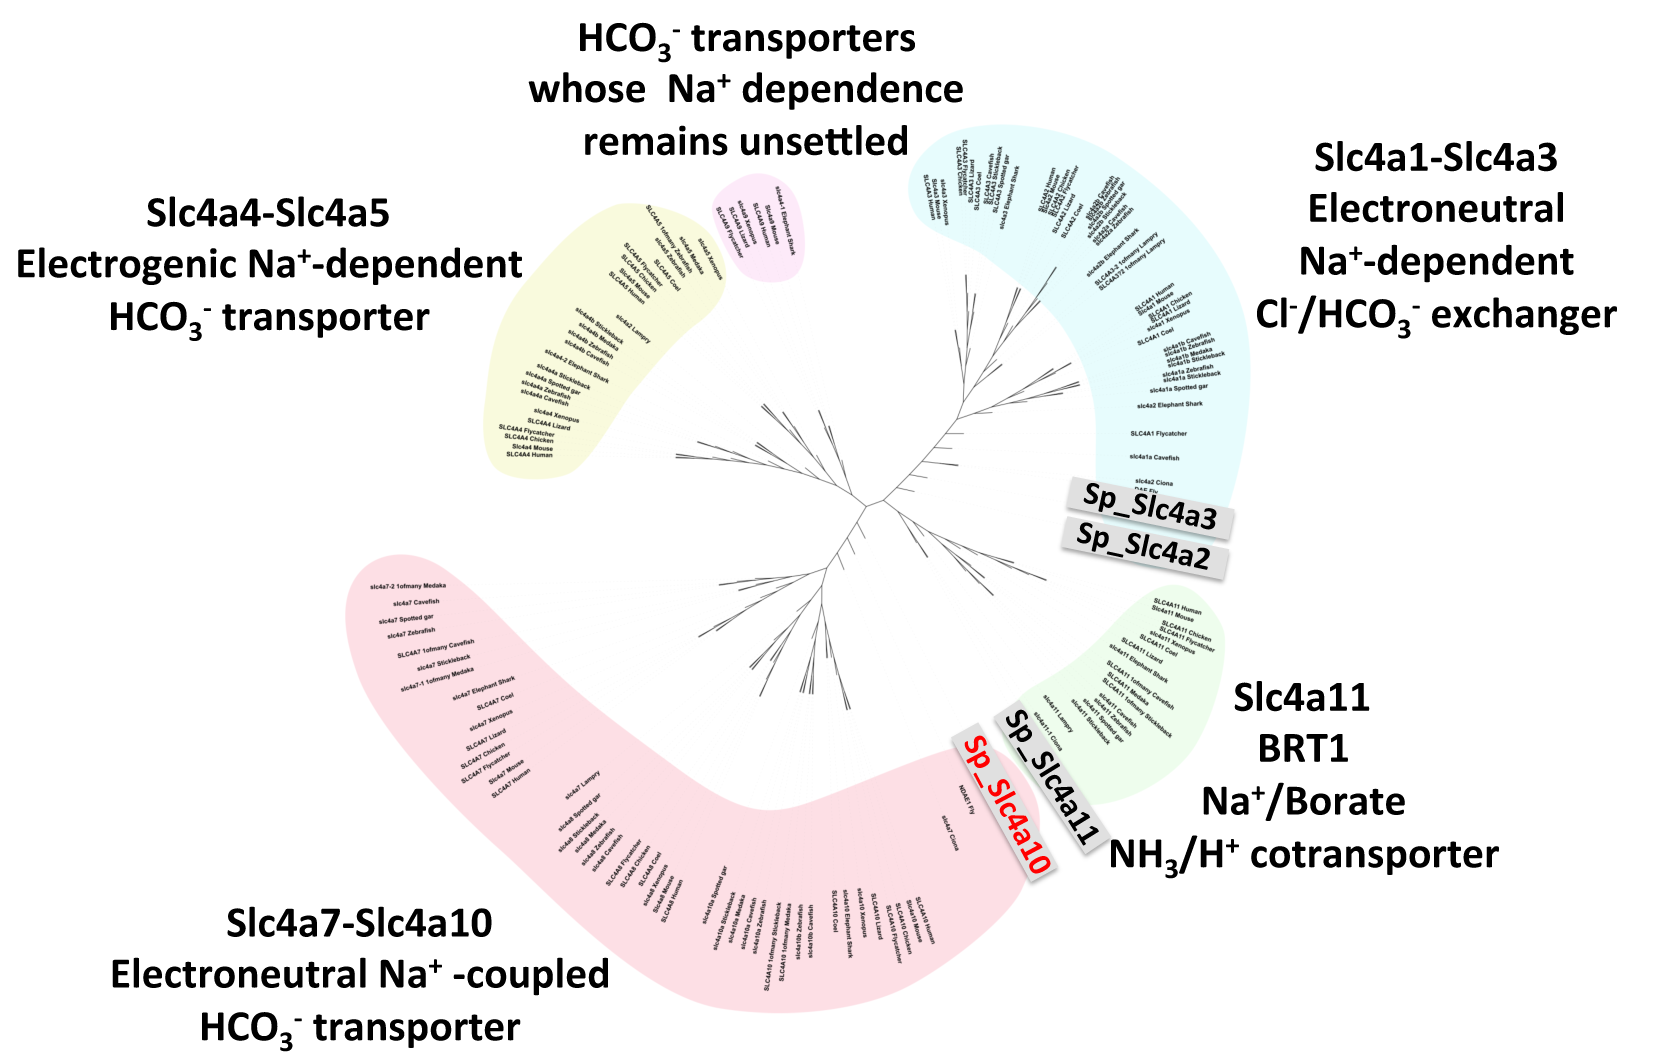

Supplement: supp [file elife-36600-supp-v1.zip › elife_poa_e36600_Figure_1_figure_supplement_2.tif]

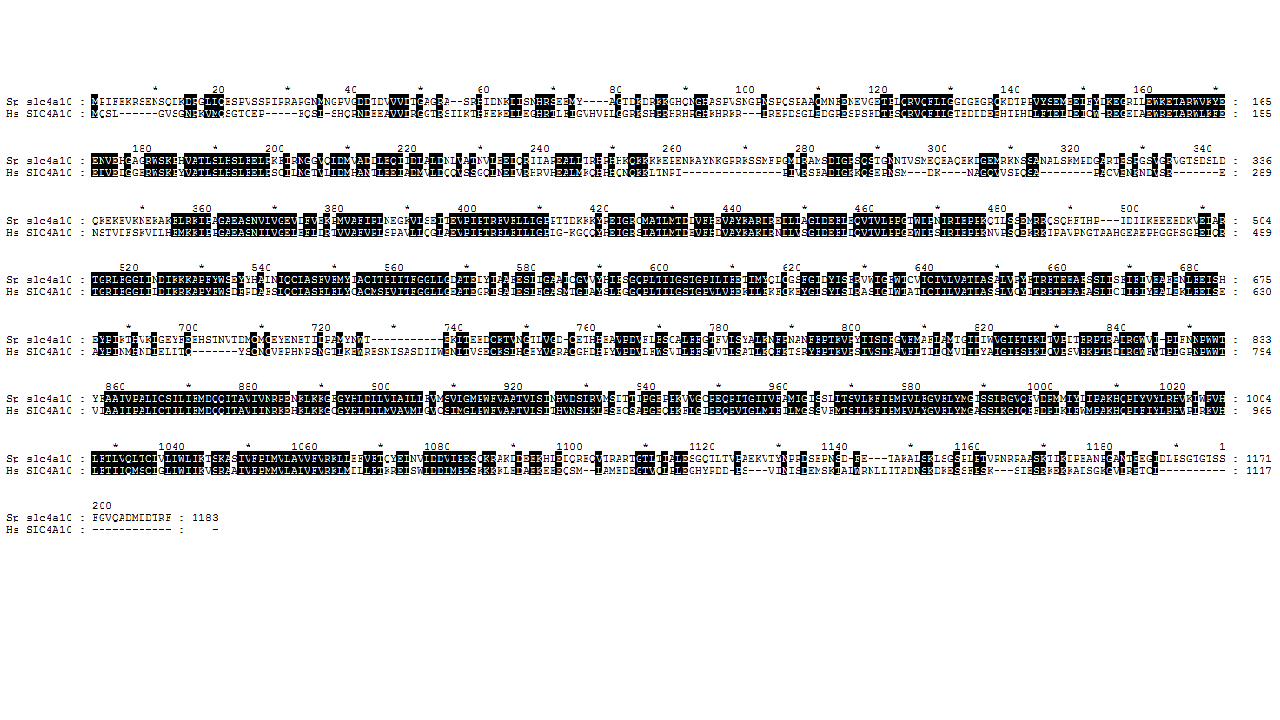

Supplement: supp [file elife-36600-supp-v1.zip › elife_poa_e36600_Figure_1_figure_supplement_3.tif]

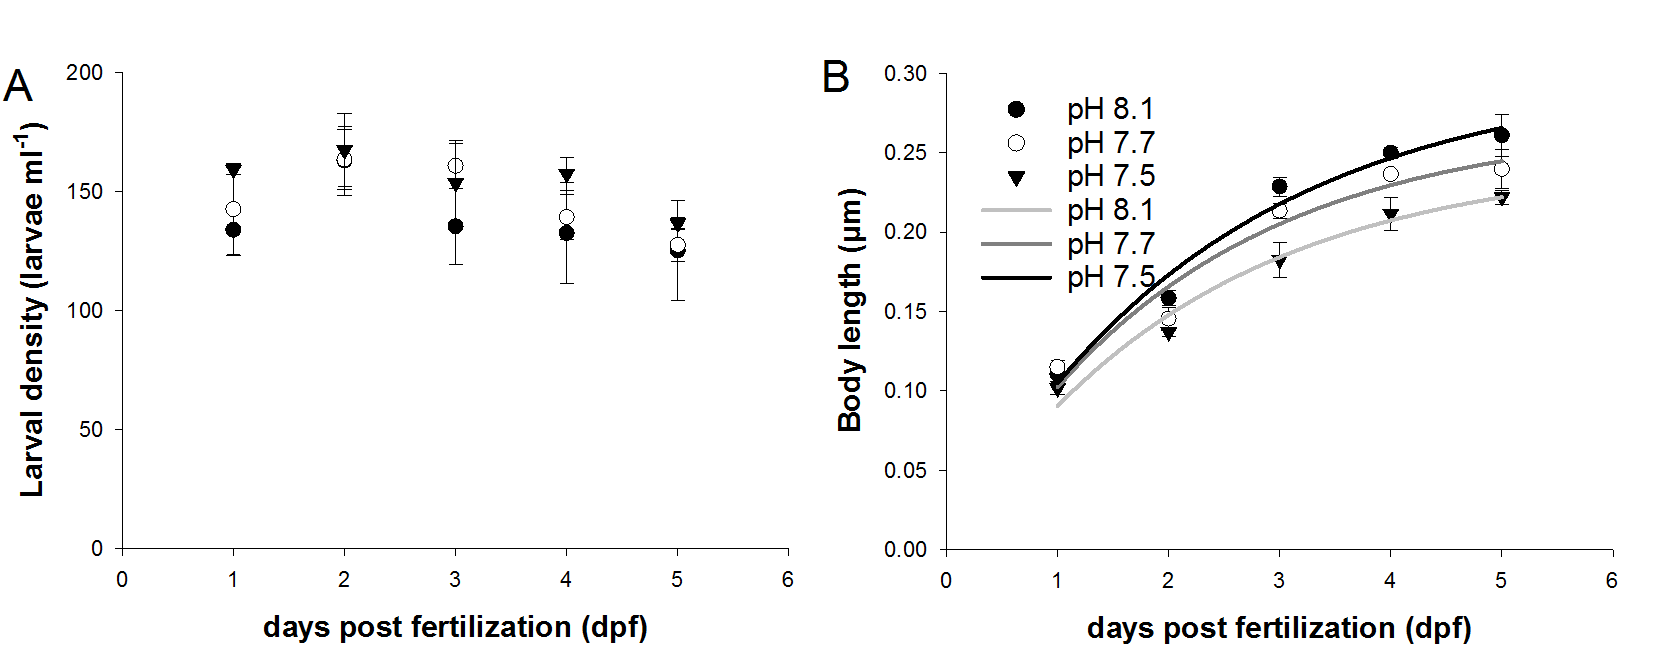

Supplement: supp [file elife-36600-supp-v1.zip › elife_poa_e36600_Figure_4_figure_supplement_1.tif]

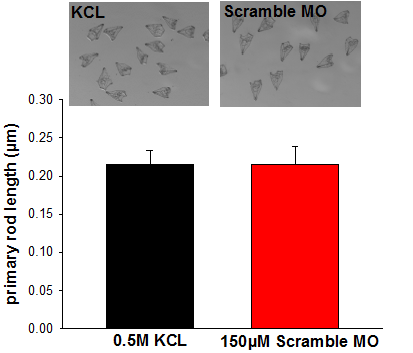

Supplement: supp [file elife-36600-supp-v1.zip › elife_poa_e36600_Figure_2_figure_supplement_1.tif]
